# Supplementary material for: Deep Learning Approaches for Detecting of Nascent Geographic Atrophy in Age-Related Macular Degeneration
Source: PubMed Central journal article supplement — Ophthalmol Sci. 2023 Nov 17;4(3):100428. doi: 10.1016/j.xops.2023.100428 (PMC10818248; doi:10.1016/j.xops.2023.100428), 2023-11-17
Supplement: mmc1.pdf [file mmc1.pdf]

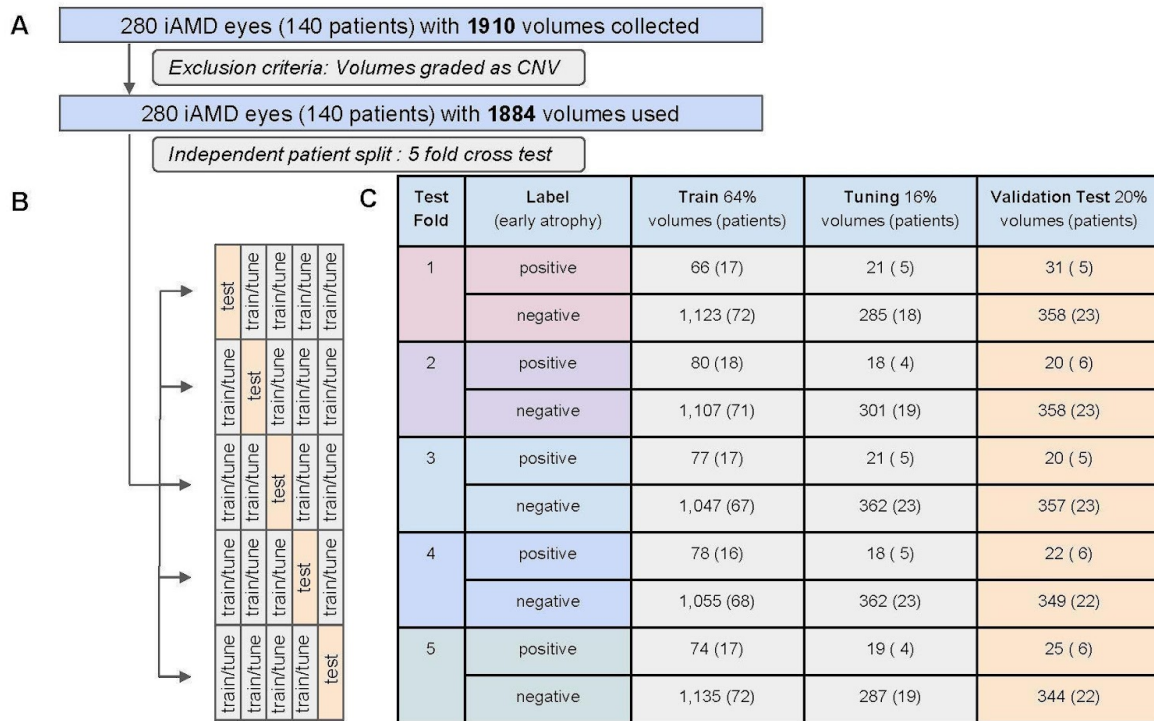

**Supplemental Figure S2.** (A) Flowchart describing the number of optical coherence tomography (OCT) volume scans, eyes and participants included before and after excluding visits at or after the development of neovascular age-related macular degeneration (nAMD). (B)-(C) The data split for the combined training and tuning (train/tune in subfigure B) and validation test (test in subfigure B) sets were presented, stratified for the presence of nascent geographic atrophy (nGA) at the individual level.
