# Supplementary material for: Deep Learning Approaches for Detecting of Nascent Geographic Atrophy in Age-Related Macular Degeneration
Source: PubMed Central journal article supplement — Ophthalmol Sci. 2023 Nov 17;4(3):100428. doi: 10.1016/j.xops.2023.100428 (PMC10818248; doi:10.1016/j.xops.2023.100428), 2023-11-17
Supplement: mmc2.pdf [file mmc2.pdf]

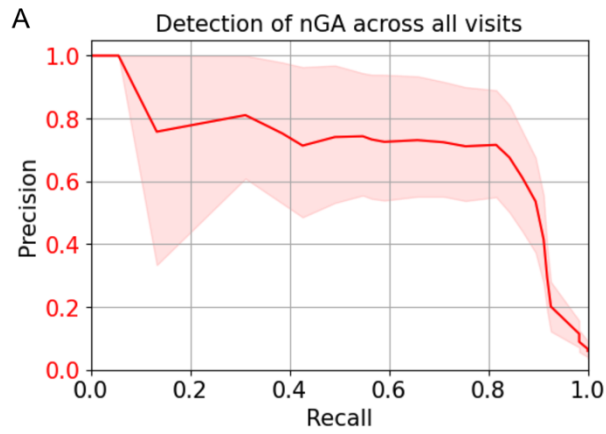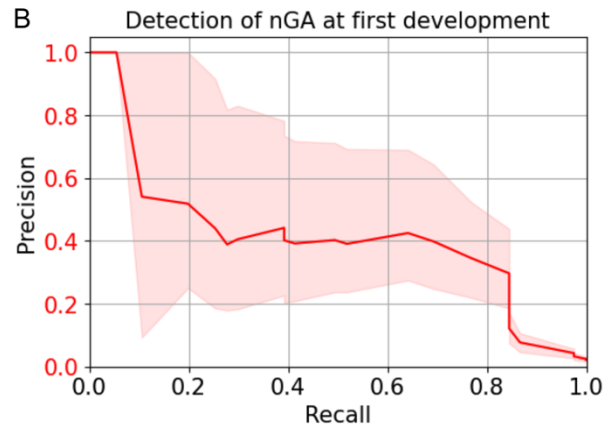

**Supplemental Figure S3.** Precision Recall Curve of the fully automated artificial intelligence (AI) approach for detecting nascent geographic atrophy (nGA) in the combined validation test sets, for (A) detection of nGA across all visits, (B) detection of nGA at first development.
