# Supplementary material for: Deep Learning Approaches for Detecting of Nascent Geographic Atrophy in Age-Related Macular Degeneration
Source: PubMed Central journal article supplement — Ophthalmol Sci. 2023 Nov 17;4(3):100428. doi: 10.1016/j.xops.2023.100428 (PMC10818248; doi:10.1016/j.xops.2023.100428), 2023-11-17
Supplement: mmc4.pdf [file mmc4.pdf]

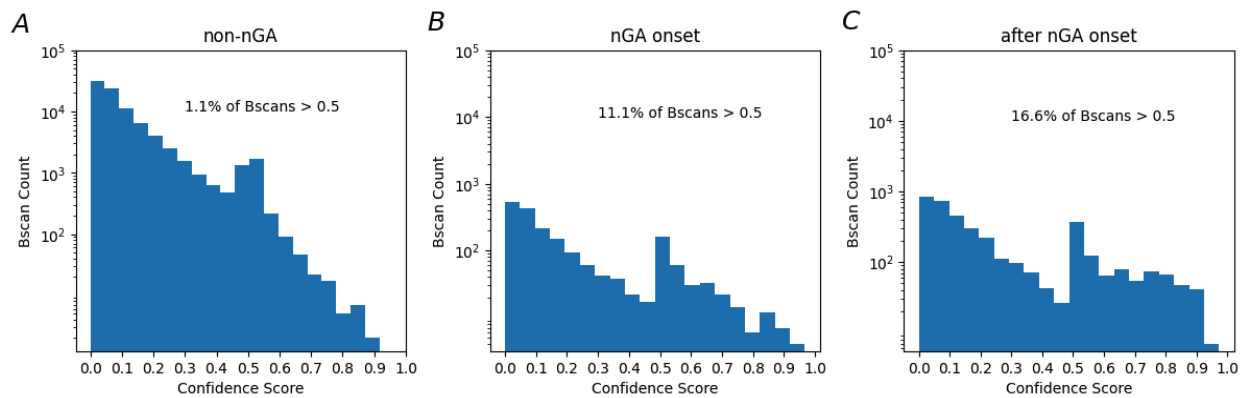

**Supplemental Figure S6.** AI predicted B-scan confidence score across (A) all non-nGA visits, (B) nGA onset visits, (C) all visits after nGA onset. Note that in this weakly supervised setting, the confidence score is not the calibrated probability since the B-scan wise label shouldn't be used.
