# Supplementary material for: Deep Learning Approaches for Detecting of Nascent Geographic Atrophy in Age-Related Macular Degeneration
Source: PubMed Central journal article supplement — Ophthalmol Sci. 2023 Nov 17;4(3):100428. doi: 10.1016/j.xops.2023.100428 (PMC10818248; doi:10.1016/j.xops.2023.100428), 2023-11-17
Supplement: mmc5.pdf [file mmc5.pdf]

## **Supplementary Section - Data format**

The OCT volume scans were exported as raw OCT files (in a .vol format) from the Heidelberg Eye Explorer (HEYEX), which contains a stack of unprocessed OCT B-scans. These raw files were then converted to a DICOM (.dcm) format when they were used in the deep learning model development and evaluation.
