# Supplementary material for: Deep Learning Approaches for Detecting of Nascent Geographic Atrophy in Age-Related Macular Degeneration
Source: PubMed Central journal article supplement — Ophthalmol Sci. 2023 Nov 17;4(3):100428. doi: 10.1016/j.xops.2023.100428 (PMC10818248; doi:10.1016/j.xops.2023.100428), 2023-11-17
Supplement: mmc6.pdf [file mmc6.pdf]

**Table S2.** Detailed performance of the fully automated artificial intelligence (AI) approach for detecting nascent geographic atrophy (nGA) in the combined validation test sets.

| <b>AUC</b>                  | <b>AUPRC</b>            | <b>Training and Tuning Specificity<sup>#</sup></b> | <b>Precision</b>       | <b>Accuracy</b>        | <b>F1</b>              |
|-----------------------------|-------------------------|----------------------------------------------------|------------------------|------------------------|------------------------|
| <b>All Visits</b>           |                         |                                                    |                        |                        |                        |
|                             |                         | 0.99                                               | 0.73<br>(0.54 to 0.89) | 0.97<br>(0.95 to 0.98) | 0.74<br>(0.61 to 0.84) |
| 0.94<br>(0.90 to 0.97)      | 0.71*<br>(0.56 to 0.87) | 0.98                                               | 0.65<br>(0.48 to 0.81) | 0.96<br>(0.94 to 0.98) | 0.74<br>(0.61 to 0.85) |
|                             |                         | 0.95                                               | 0.50<br>(0.37 to 0.75) | 0.94<br>(0.91 to 0.96) | 0.65<br>(0.52 to 0.76) |
| <b>At First Development</b> |                         |                                                    |                        |                        |                        |
|                             |                         | 0.99                                               | 0.41<br>(0.23 to 0.65) | 0.97<br>(0.95 to 0.98) | 0.45<br>(0.31 to 0.60) |
| 0.91<br>(0.86 to 0.96)      | 0.41<br>(0.27 to 0.63)  | 0.98                                               | 0.38<br>(0.23 to 0.57) | 0.97<br>(0.95 to 0.98) | 0.50<br>(0.35 to 0.65) |
|                             |                         | 0.95                                               | 0.27<br>(0.17 to 0.39) | 0.94<br>(0.92 to 0.97) | 0.40<br>(0.28 to 0.54) |

All values are presented as the estimate (95% confidence interval); <sup>#</sup> = based on threshold determined from the training and tuning sets; Note: Recall is reported in Table 1 as Sensitivity. \*0.36 if without imagenet pretraining.
